# Supplementary material
Source: PubMed Central journal article supplement (PMC10457656)
Supplement: Suppl_FigS1.pdf [file Suppl_FigS1.pdf]

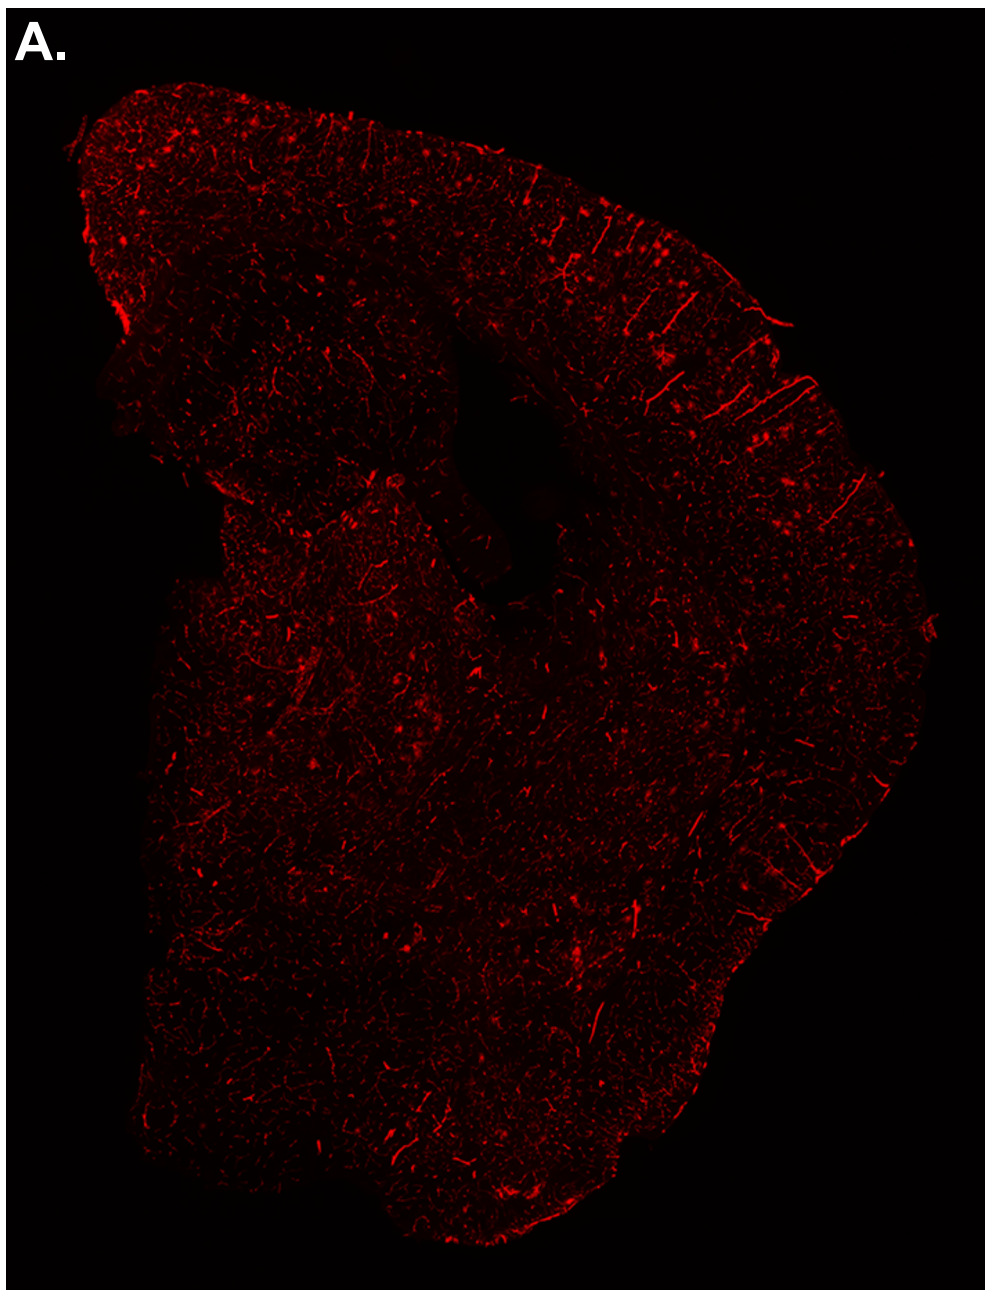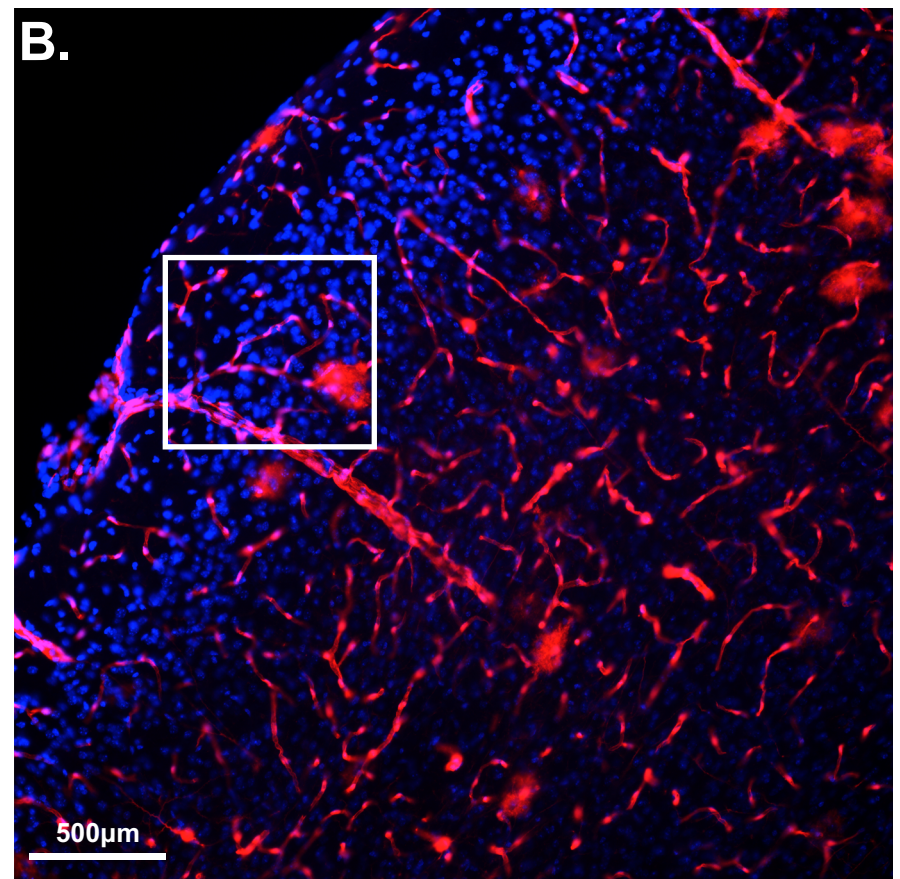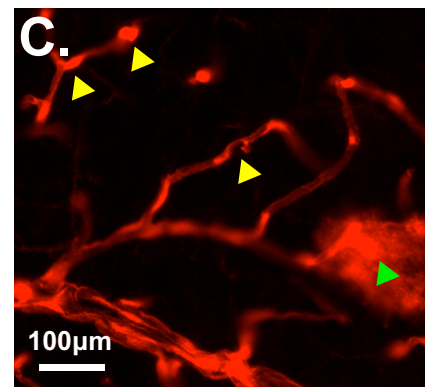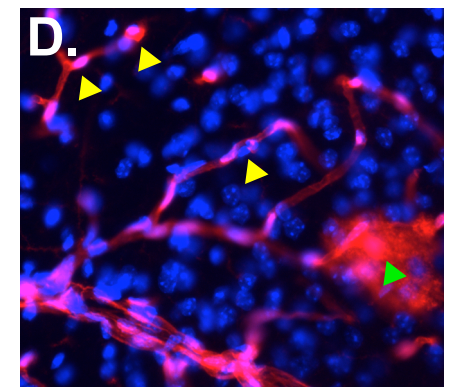

**Supplementary Figure 1.** AAV-PR-CBA-Cre mediates robust transduction of brain vasculature after intravenous delivery in Ai9 (Floxed-stop-tdTomato) mice. **A.** Half hemisphere imaging of tdTomato expression showing vasculature morphology. **B.** Higher magnification images showing transduction of vascular cells. **C, D.** Higher magnification! images of the rectangle region in B. **C, D.** Yellow arrow heads indicate transduced vascular cells and the green arrow shows a transduce cell with a "bushy" morphology.
