# Supplementary material
Source: PubMed Central journal article supplement (PMC10457656)
Supplement: Suppl_FigS2.pdf [file Suppl_FigS2.pdf]

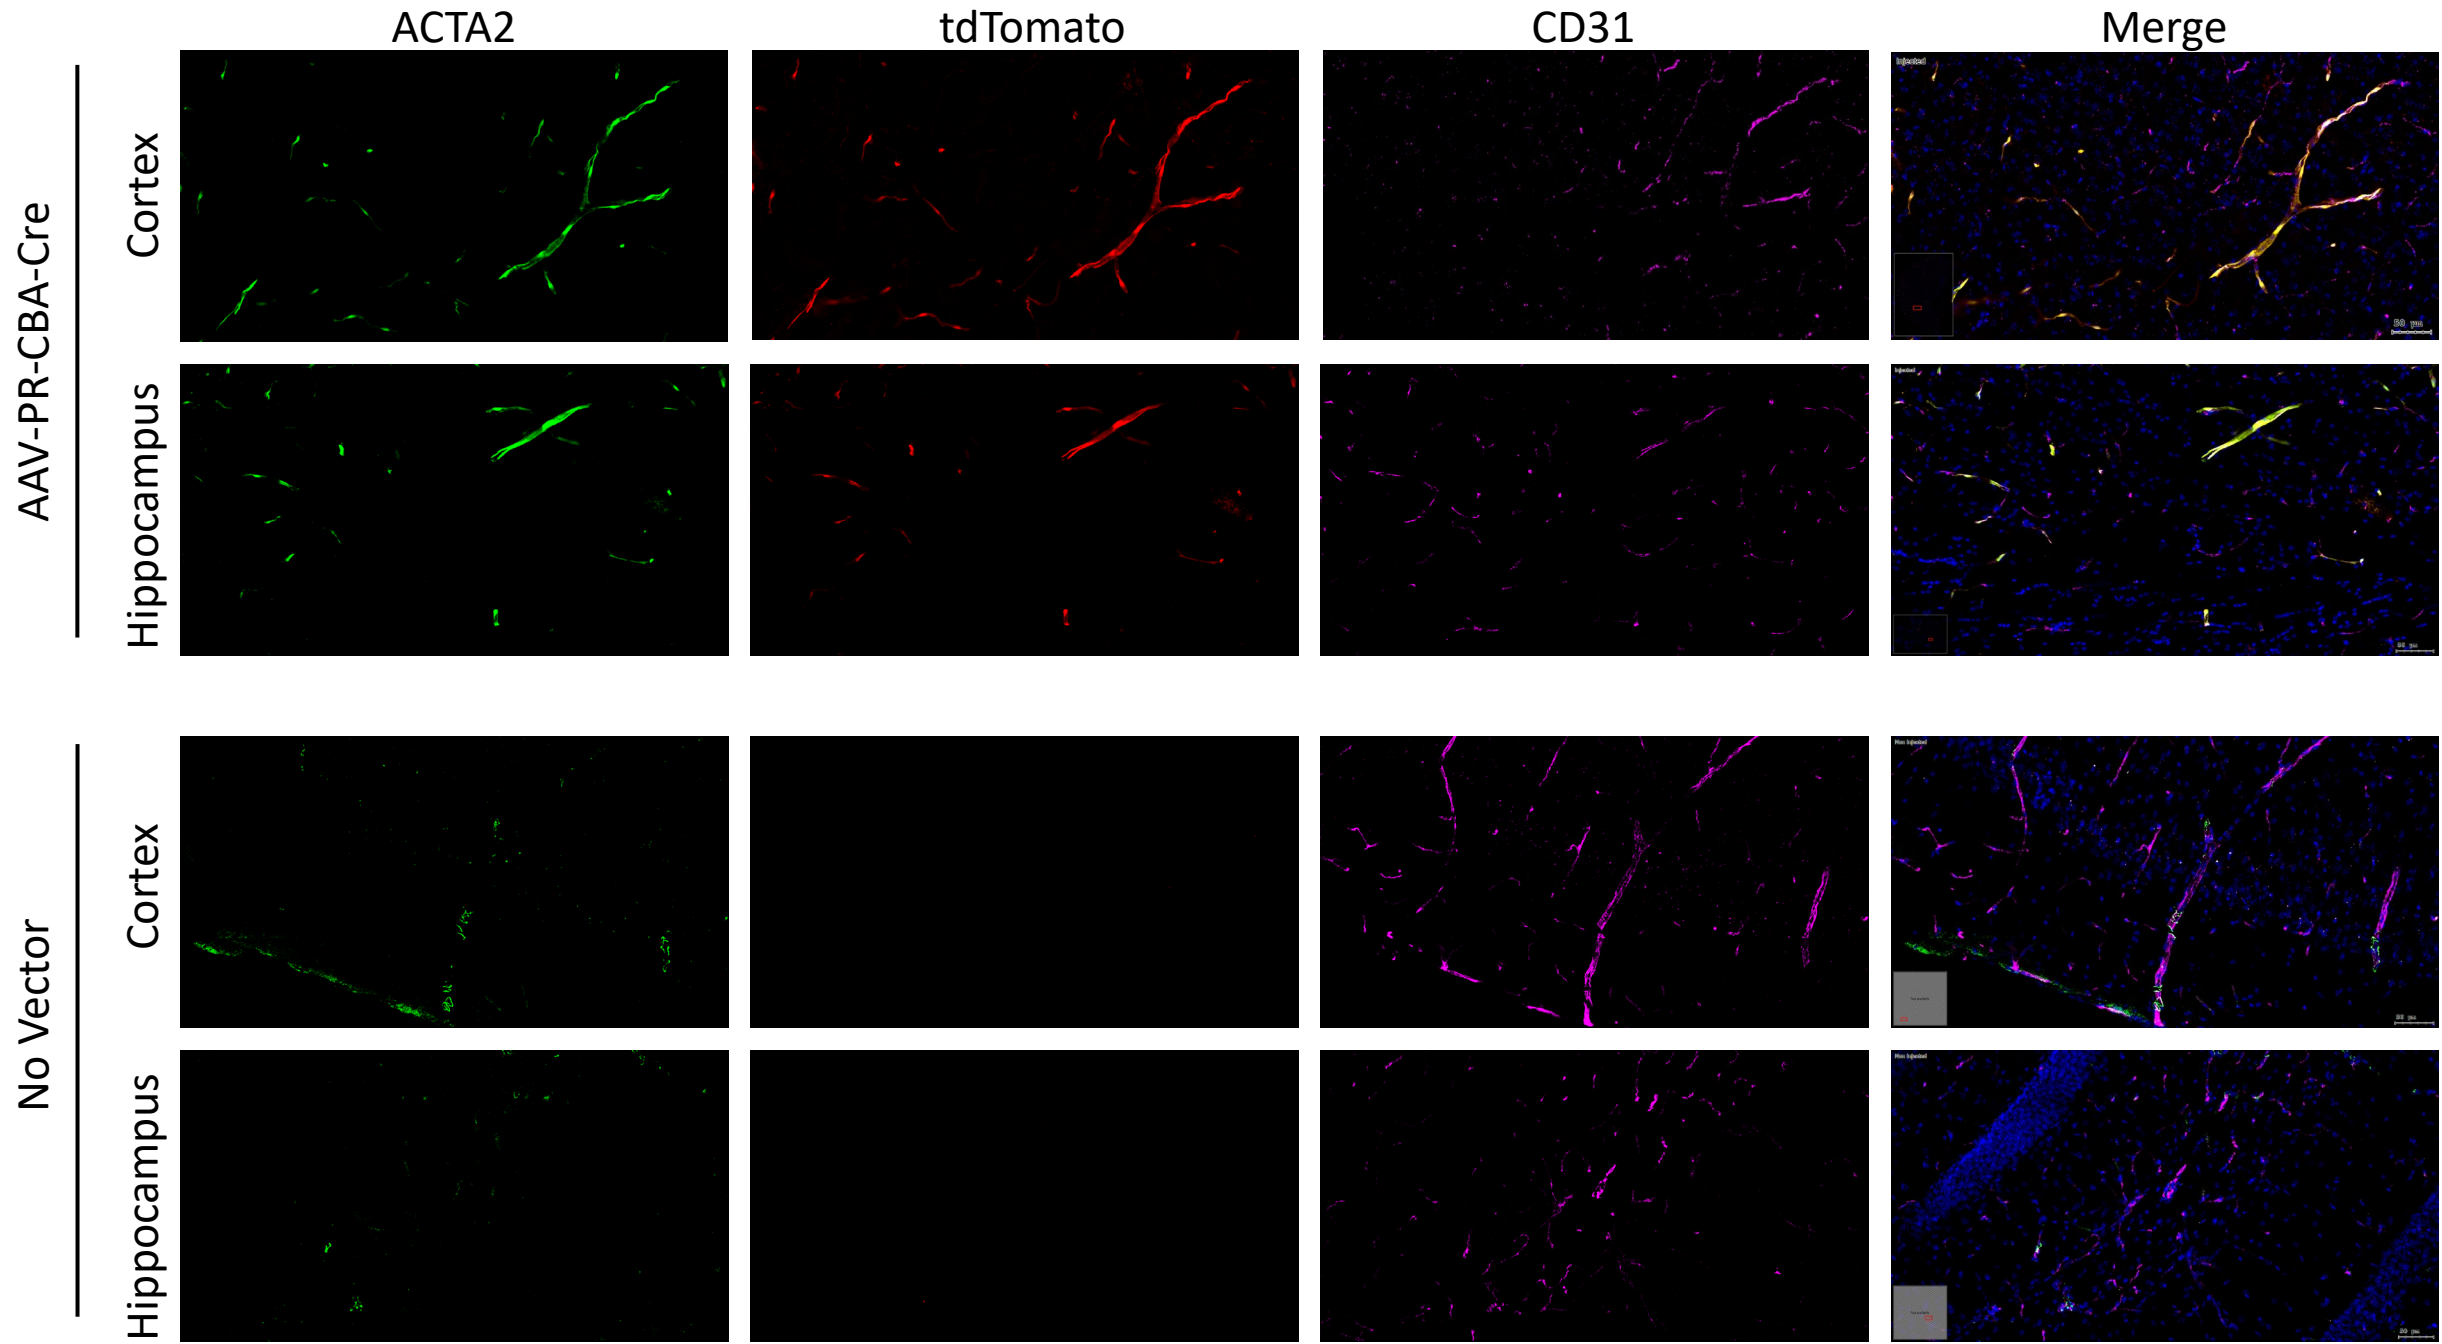

Figure S2. AAV-PR-Cre transduces smooth muscle cells with high colocalization with ACTA2 and low co-localization with the endothelial cell marker CD31. These images are from the same Ai9-floxed-STOP-tdTomato mice injected iv with AAV-CBA-Cre in Figure 1
