# Supplementary material
Source: PubMed Central journal article supplement (PMC10457656)
Supplement: Suppl_FigS3.pdf [file Suppl_FigS3.pdf]

## Figure S3

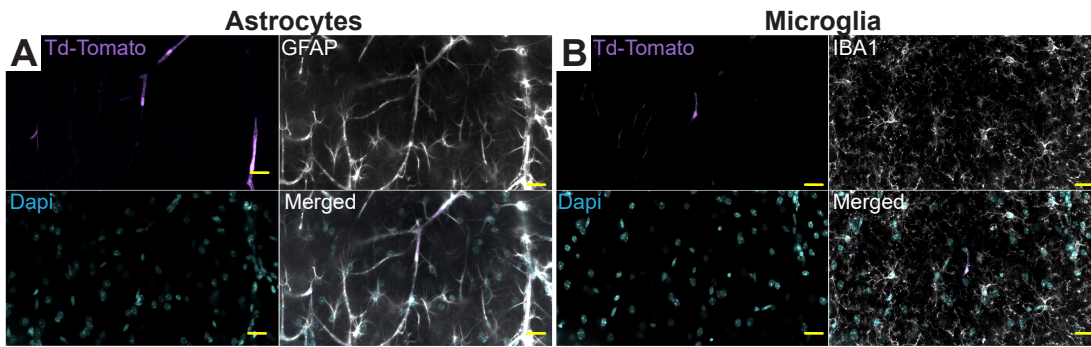

Supplementary Fig. S3. AAV-PR-CBA-Cre does not transduce (A) astrocytes (GFAP) or (B) microglia (IBA1). These images are from the same mice injected with AAV-PR-CBA-Cre in Figs. 1 and 2.
