# Supplementary material
Source: PubMed Central journal article supplement (PMC10457656)
Supplement: Suppl_FigS4.pdf [file Suppl_FigS4.pdf]

Figure S4

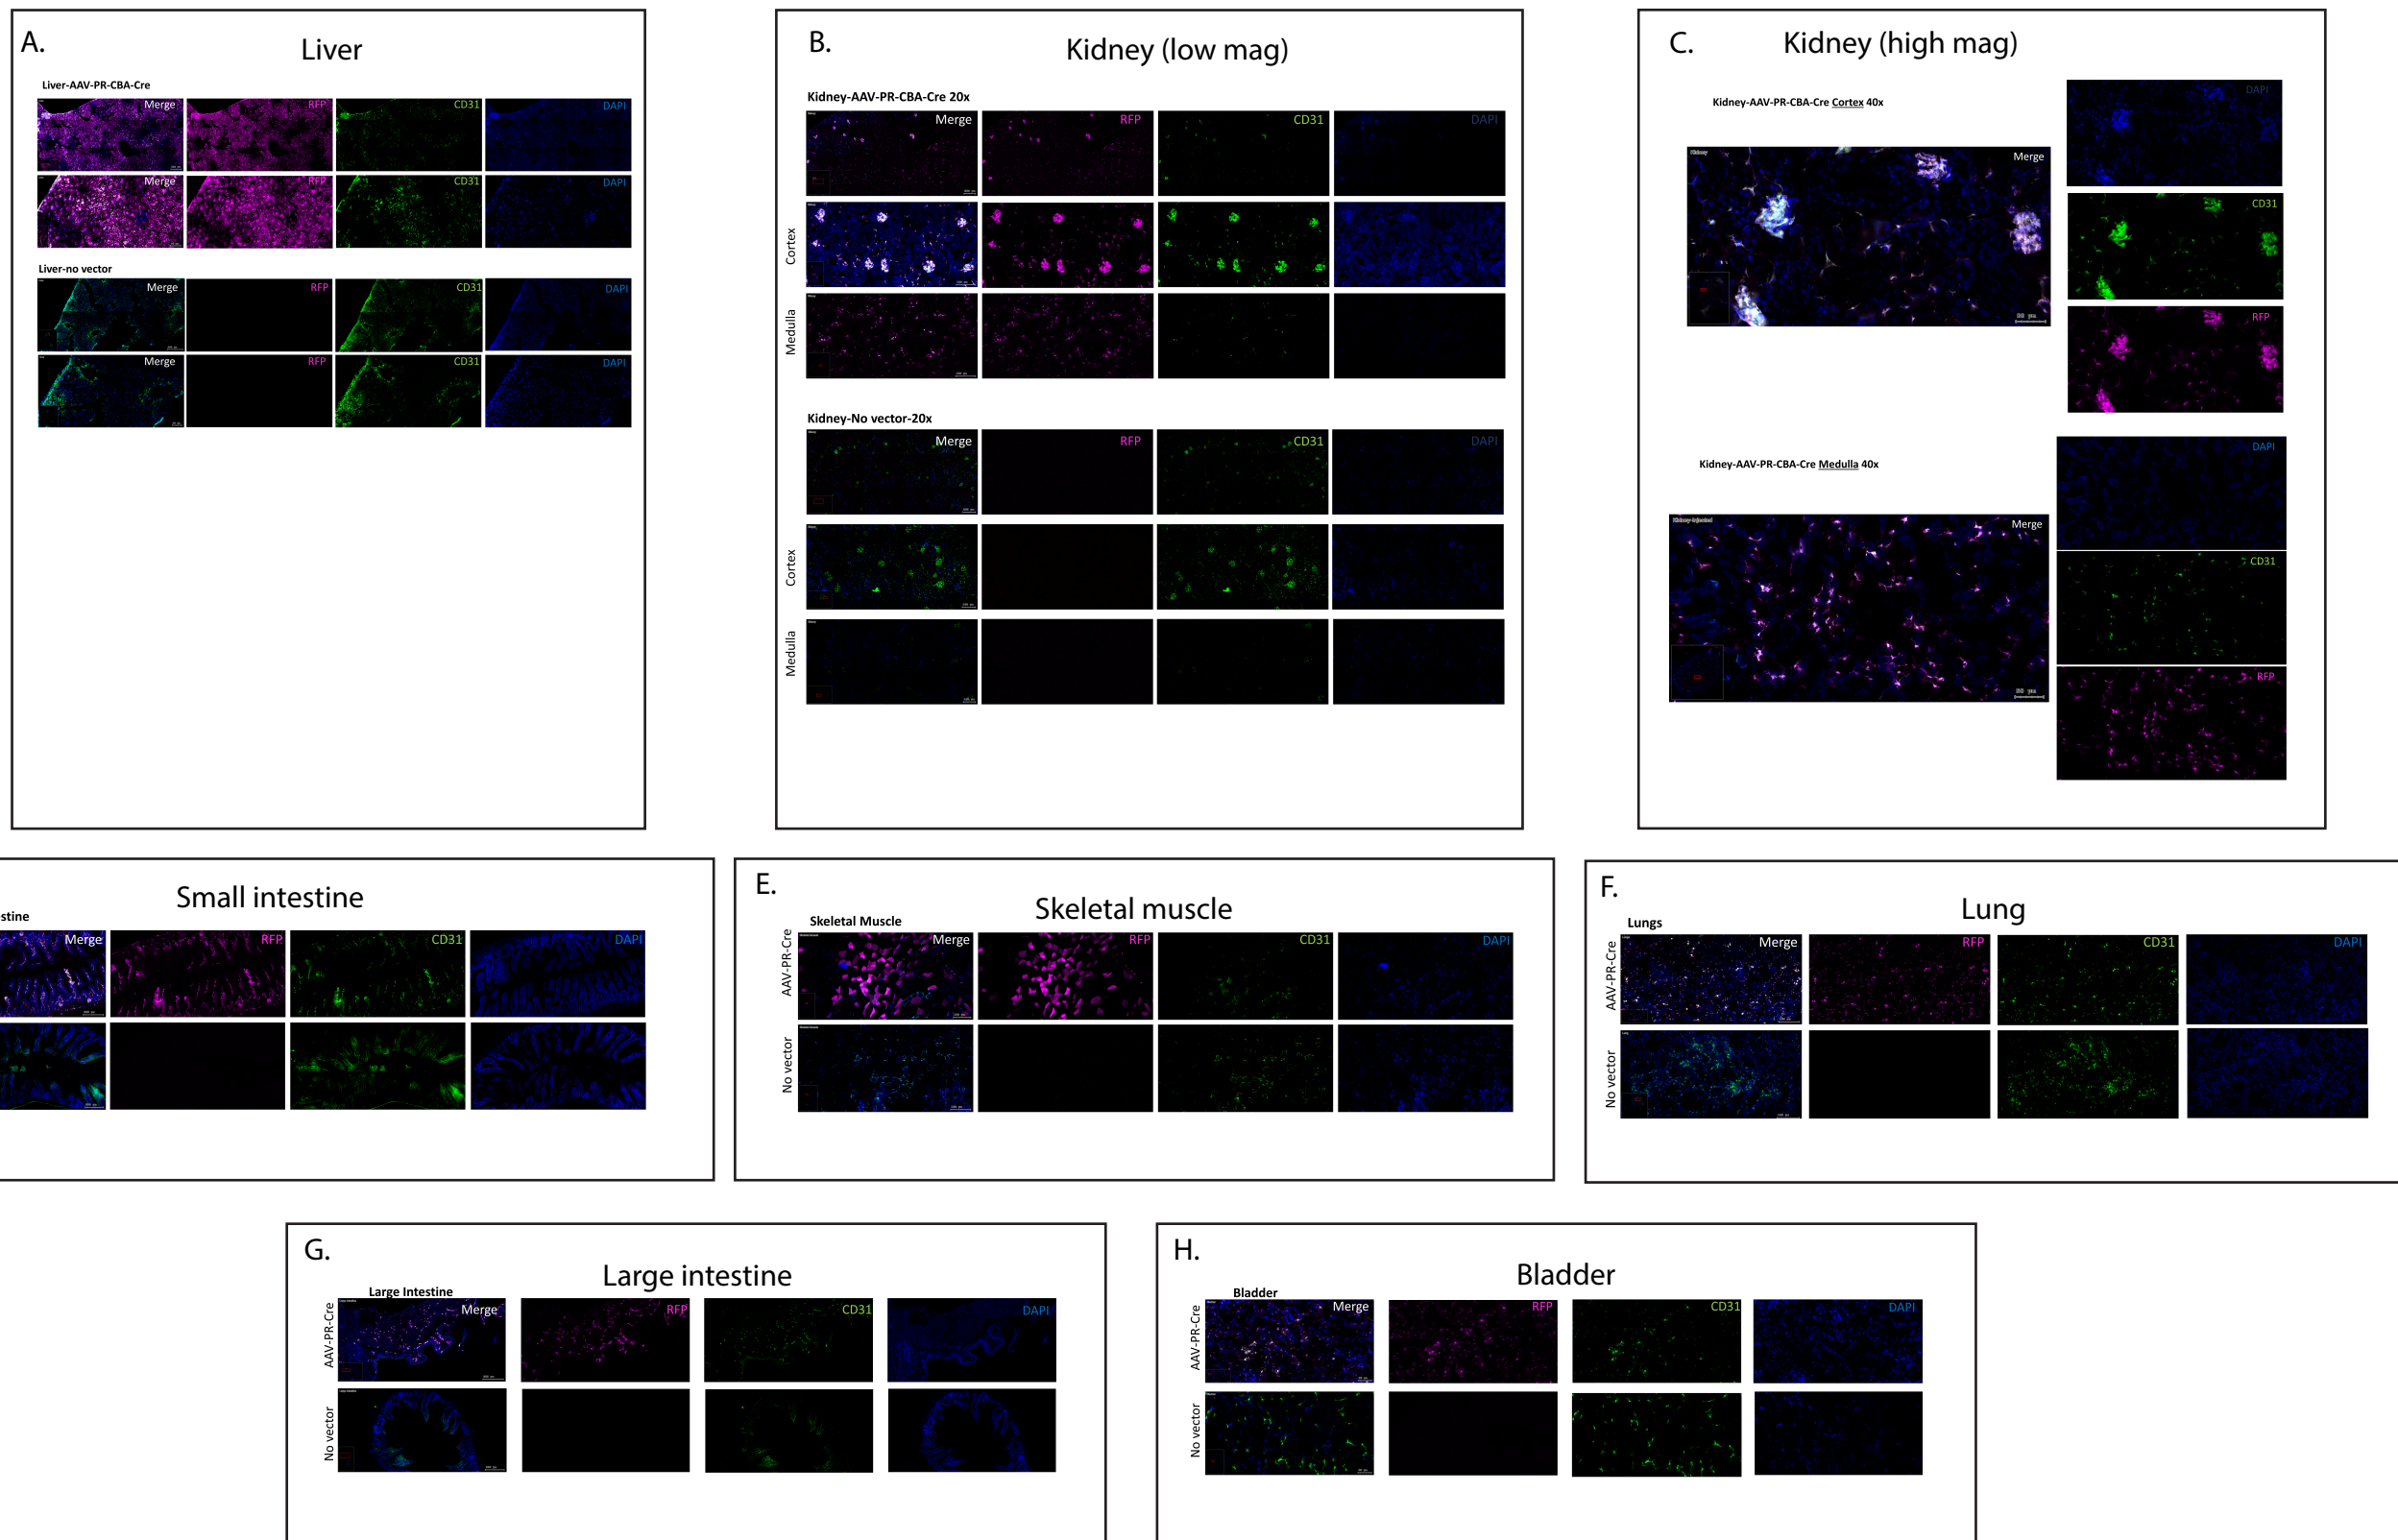

Supplementary Figure S4. AAV-PR transduces many peripheral organs after intravascular injection. AAV-PR-CBA-Cre was injected i.v. into Ai9 (CAG-floxed-STOP-tdTomato) mice and 5 weeks later, mice were harvested and analyzed for tdTomato expression (red fluorescent protein, RFP in magenta). Sections were also stained for CD31 to observe endothelium staining and co-localization with tdTomato expression. For each panel the organ is listed, as well as a representative AAV-PR-CBA-Cre injected animal and a no-vector animal to show that tdTomato expression is Cre-dependent.
