# Supplementary material
Source: PubMed Central journal article supplement (PMC10457656)
Supplement: Suppl_FigS5.pdf [file Suppl_FigS5.pdf]

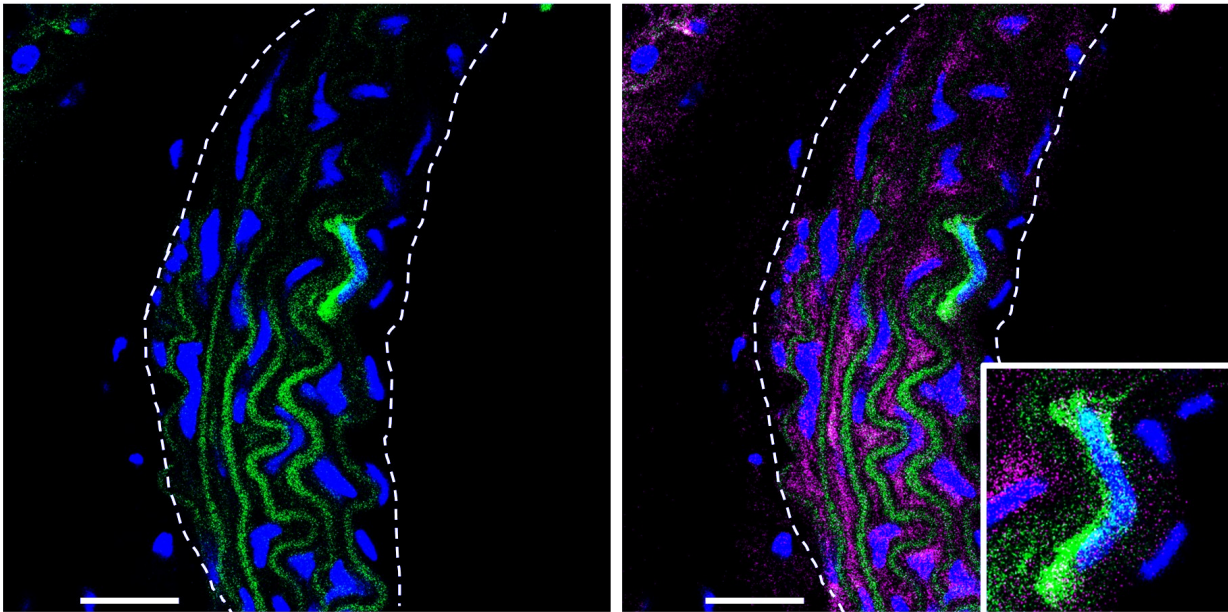

Supplementary Figure 5. AAV-PR-sc-CBA-GFP can transduce smooth muscle cells in the aorta of systemically injected mice. A representative image from a BALB/c mouse is shown. Mice were sacrificed two weeks after injection and aorta sections stained with DAPI (nuclei, blue), anti-SM22 $\alpha$  (smooth muscle, magenta). Intrinsic GFP fluorescence is displayed in green. Inset: Zoom-in on transduced smooth muscle cell. Scale bar= 30  $\mu$ m.
