# Supplementary material
Source: PubMed Central journal article supplement (PMC10457656)
Supplement: Suppl_FigS6.pdf [file Suppl_FigS6.pdf]

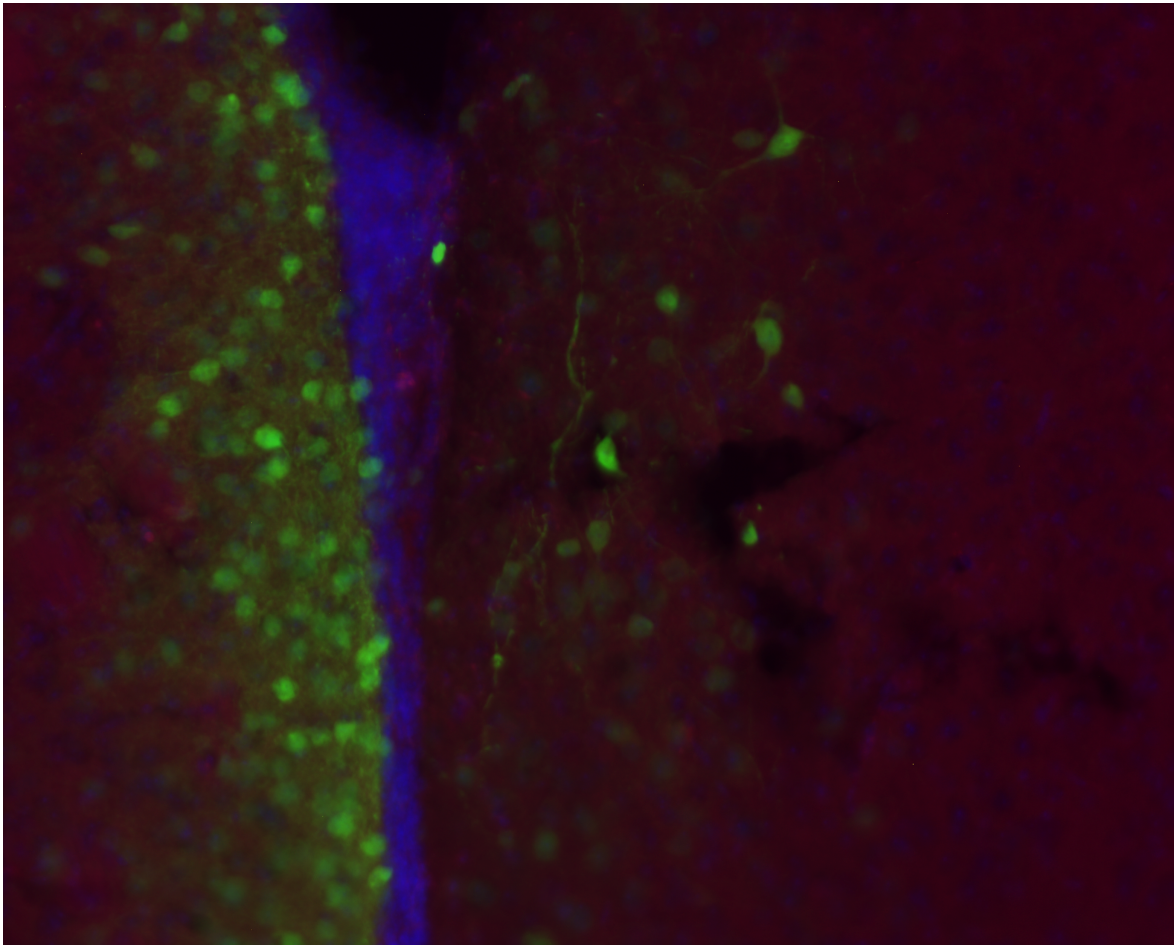

Supplementary Figure S6. AAV-PR-sc-CBA-GFP transduction via lateral ventricle injection is primarily localized to cells surrounding the ventricle. These cells did not appear to be associated with the vasculature (e.g. pericytes or smooth muscle cells).
